# Supplementary material for: Genome-wide maps of distal gene regulatory enhancers active in the human placenta
Source: PubMed Central journal article supplement (PMC6320013; doi:10.1371/journal.pone.0209611), 2018-12-27

**A** Enhancer vs. Non-enhancer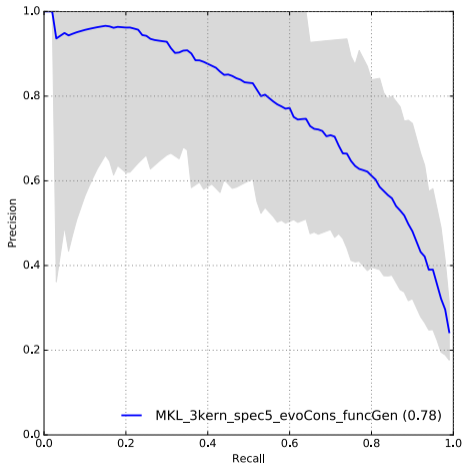**B** Placenta vs. Other Tissues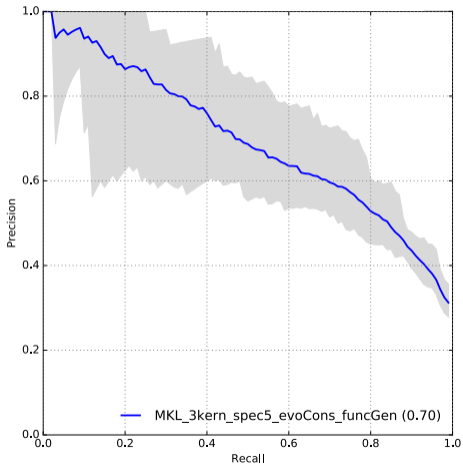

Supplement: pone.0209611.s001.pdf [file pone.0209611.s001.pdf]
